# Supplementary material for: Does Parenting Moderate the Association Between Adverse Childhood Experiences and Adolescents’ Future Orientation?
Source: Springer Nature journal article supplement (doi:10.1007/s10826-022-02275-4), 2022-03-23
Supplement: MOESM1 [file 20248776]

Supplementary Table 1.

*Linear Regression Results Predicting Future Orientation*

|  | Model 1 | | | |  | Model 2 | | | |  | Model 3 | | | |
| --- | --- | --- | --- | --- | --- | --- | --- | --- | --- | --- | --- | --- | --- | --- |
| Predictor | B | S.E. | Beta | *p* |  | B | S.E. | Beta | *p* |  | B | S.E. | Beta | *p* |
| Constant | 21.69 | 0.49 |  | <.001 |  | 22.28 | 0.52 |  | <.001 |  | 19.79 | 1.46 |  | <.001 |
| Adolescent age [16 years] | 0.17 | 0.20 | 0.02 | 0.393 |  | 0.16 | 0.20 | 0.02 | 0.400 |  | 0.16 | 0.20 | 0.02 | 0.423 |
| Adolescent gender [female] | -1.03 | 0.19 | -0.12 | <.001 |  | -1.00 | 0.19 | -0.12 | <.001 |  | -0.84 | 0.20 | -0.10 | <.001 |
| Adolescent Indigenous status [not Indigenous] | -0.37 | 0.70 | -0.01 | 0.599 |  | -0.27 | 0.70 | -0.01 | 0.695 |  | -0.28 | 0.69 | -0.01 | 0.682 |
| Mother education - Less than Year 12 [Year 12] | 0.28 | 0.50 | 0.02 | 0.572 |  | 0.29 | 0.50 | 0.02 | 0.567 |  | 0.22 | 0.50 | 0.01 | 0.659 |
| Mother education - More than Year 12 [Year 12] | -0.09 | 0.37 | -0.01 | 0.815 |  | -0.06 | 0.37 | -0.01 | 0.872 |  | -0.08 | 0.37 | -0.01 | 0.821 |
| Mother employment [employed] | 0.13 | 0.31 | 0.01 | 0.662 |  | 0.14 | 0.31 | 0.01 | 0.646 |  | 0.12 | 0.31 | 0.01 | 0.695 |
| Household language [English] | 0.38 | 0.31 | 0.03 | 0.223 |  | 0.32 | 0.31 | 0.02 | 0.306 |  | 0.36 | 0.32 | 0.03 | 0.260 |
| Household income | 0.00004 | 0.0001 | 0.02 | 0.439 |  | 0.00001 | 0.0001 | 0.004 | 0.881 |  | 0.0000004 | 0.0001 | 0.0002 | 0.994 |
| Area SES | 0.05 | 0.04 | 0.03 | 0.227 |  | 0.05 | 0.04 | 0.03 | 0.252 |  | 0.05 | 0.04 | 0.03 | 0.226 |
| Area remoteness [major city] | 0.20 | 0.23 | 0.02 | 0.384 |  | 0.22 | 0.23 | 0.02 | 0.347 |  | 0.16 | 0.23 | 0.02 | 0.484 |
| Adversity - 1 ACE [0 ACEs] |  |  |  |  |  | -0.65 | 0.24 | -0.07 | 0.007 |  | -0.58 | 0.24 | -0.07 | 0.016 |
| Adversity - 2-4 ACEs [0 ACEs] |  |  |  |  |  | -0.80 | 0.26 | -0.09 | 0.002 |  | -0.68 | 0.26 | -0.07 | 0.010 |
| Warmth |  |  |  |  |  |  |  |  |  |  | -0.23 | 0.18 | -0.04 | 0.195 |
| Hostility |  |  |  |  |  |  |  |  |  |  | -0.31 | 0.18 | -0.04 | 0.085 |
| Communication |  |  |  |  |  |  |  |  |  |  | 0.42 | 0.17 | 0.07 | 0.015 |
| Monitoring |  |  |  |  |  |  |  |  |  |  | 0.47 | 0.24 | 0.05 | 0.047 |
| F | 3.47*** | | | |  | 3.80*** | | | |  | 3.97*** | | | |
| R2 | .018 | | | |  | .023 | | | |  | .032 | | | |

*Note*. Reference categories for categorical variables are denoted in [brackets]. *N* = 1952.

**p* <.001.
